# Supplementary material for: Prosthetic Valve Function after Aortic Valve Replacement for Severe Aortic Stenosis by Transcatheter Procedure versus Surgery
Source: MDPI journal article supplement (doi:10.3390/jcdd9100355), 2022-10-16
Supplement: s1 [file s1]

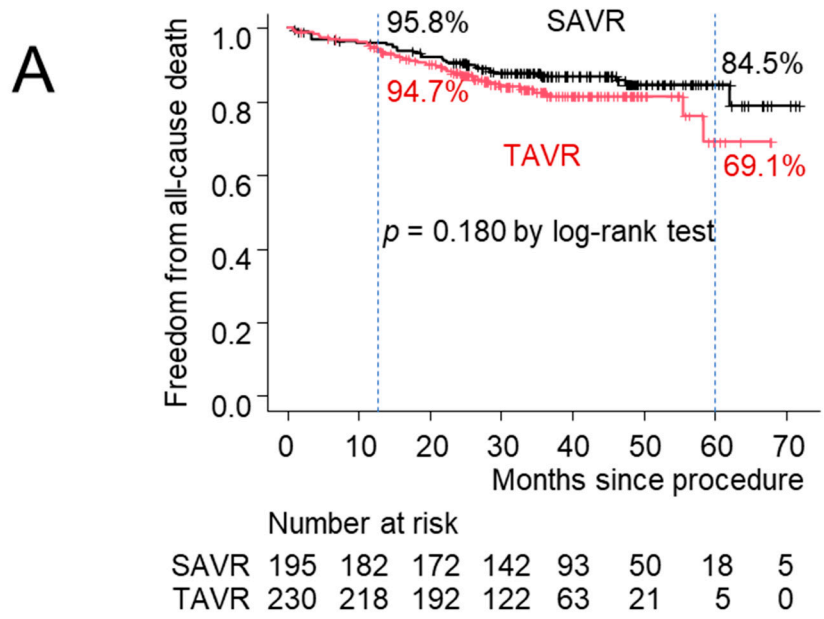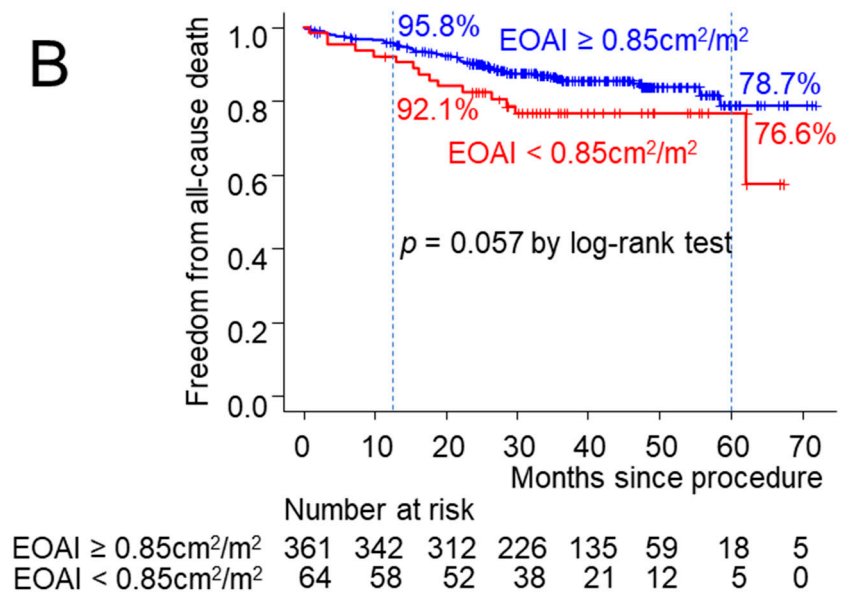

C

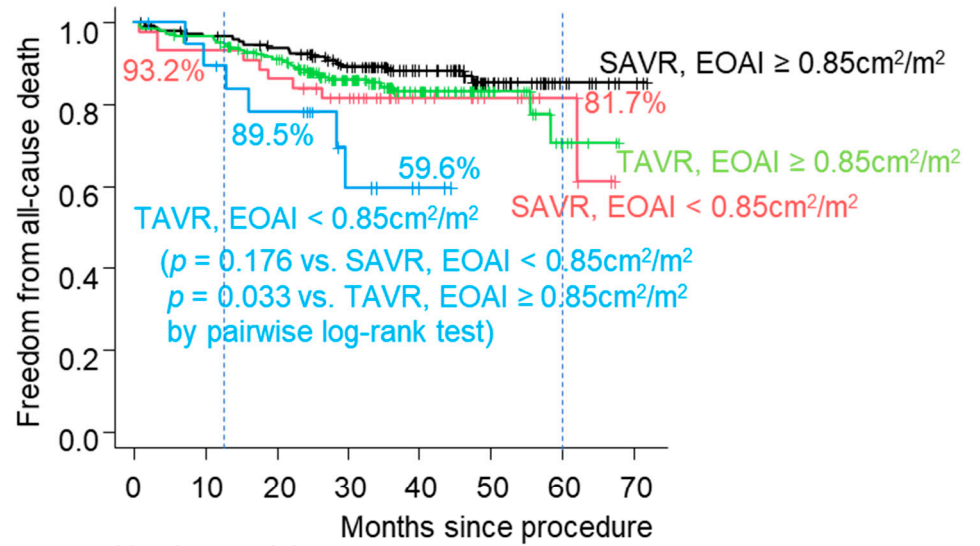

|                                              | Number at risk |     |     |     |    |    |    |   |
|----------------------------------------------|----------------|-----|-----|-----|----|----|----|---|
| SAVR, EOAI $\geq 0.85\text{cm}^2/\text{m}^2$ | 151            | 141 | 134 | 110 | 74 | 38 | 13 | 5 |
| SAVR, EOAI $< 0.85\text{cm}^2/\text{m}^2$    | 44             | 41  | 38  | 32  | 19 | 12 | 5  | 0 |
| TAVR, EOAI $\geq 0.85\text{cm}^2/\text{m}^2$ | 210            | 201 | 178 | 116 | 61 | 21 | 5  | 0 |
| TAVR, EOAI $< 0.85\text{cm}^2/\text{m}^2$    | 20             | 17  | 14  | 6   | 2  | 0  | 0  | 0 |

D

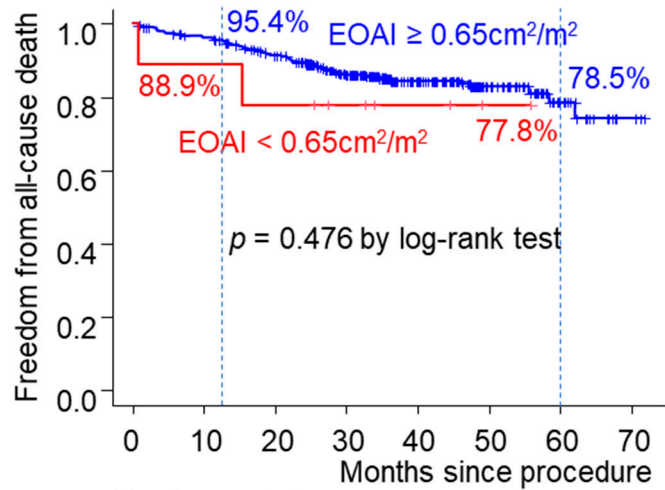

|                                        | Number at risk |     |     |     |     |    |    |   |
|----------------------------------------|----------------|-----|-----|-----|-----|----|----|---|
| EOAI $\geq 0.65\text{cm}^2/\text{m}^2$ | 416            | 392 | 357 | 259 | 153 | 70 | 23 | 5 |
| EOAI $< 0.65\text{cm}^2/\text{m}^2$    | 9              | 8   | 7   | 5   | 3   | 1  | 0  | 0 |

E

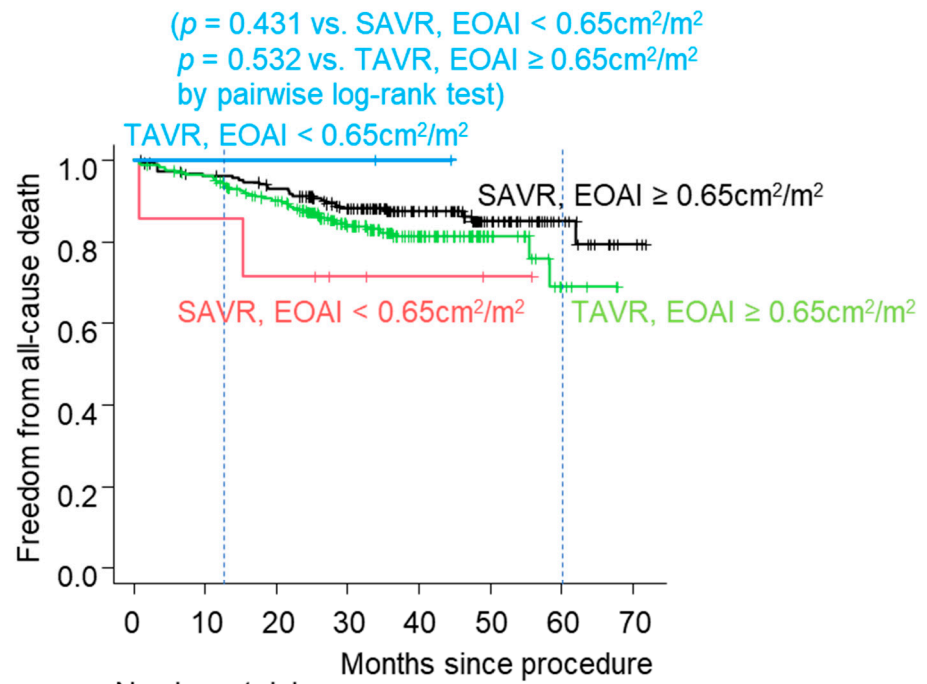

|                                              | Number at risk |     |     |     |    |    |    |   |
|----------------------------------------------|----------------|-----|-----|-----|----|----|----|---|
| SAVR, $EOAI \geq 0.65\text{cm}^2/\text{m}^2$ | 188            | 176 | 167 | 139 | 91 | 49 | 13 | 5 |
| SAVR, $EOAI < 0.65\text{cm}^2/\text{m}^2$    | 7              | 6   | 5   | 3   | 2  | 1  | 0  | 0 |
| TAVR, $EOAI \geq 0.65\text{cm}^2/\text{m}^2$ | 228            | 216 | 190 | 120 | 62 | 21 | 5  | 0 |
| TAVR, $EOAI < 0.65\text{cm}^2/\text{m}^2$    | 2              | 2   | 2   | 2   | 1  | 0  | 0  | 0 |

F

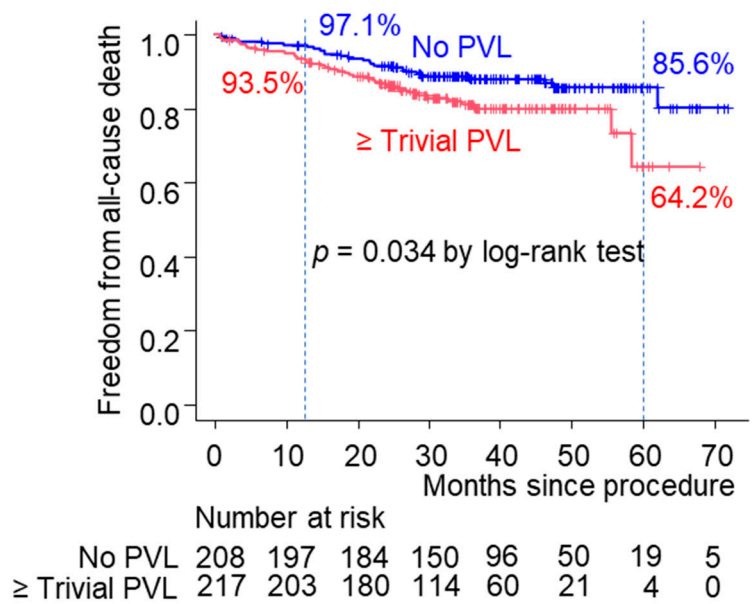

G

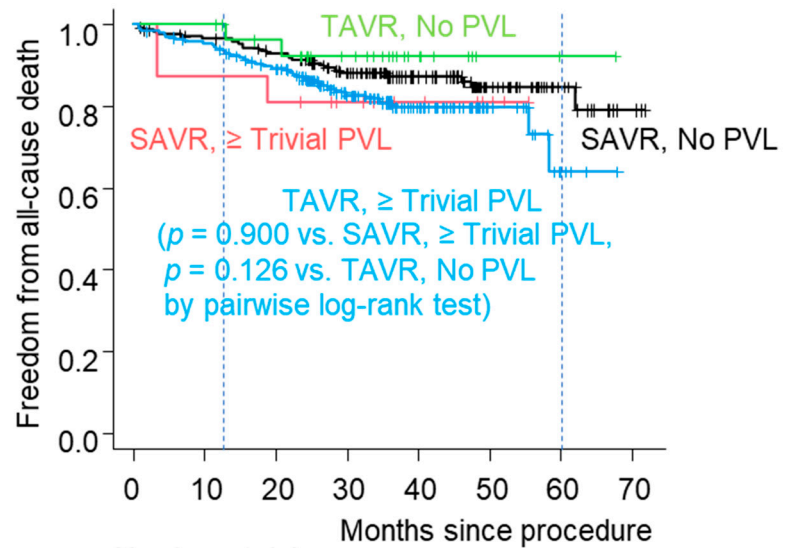

|                          | Number at risk |     |     |     |    |    |    |   |
|--------------------------|----------------|-----|-----|-----|----|----|----|---|
| SAVR, No PVL             | 179            | 168 | 159 | 132 | 87 | 47 | 18 | 5 |
| SAVR, $\geq$ Trivial PVL | 16             | 14  | 13  | 10  | 6  | 3  | 0  | 0 |
| TAVR, No PVL             | 29             | 29  | 25  | 18  | 9  | 3  | 1  | 0 |
| TAVR, $\geq$ Trivial PVL | 201            | 189 | 167 | 104 | 54 | 18 | 4  | 0 |

H

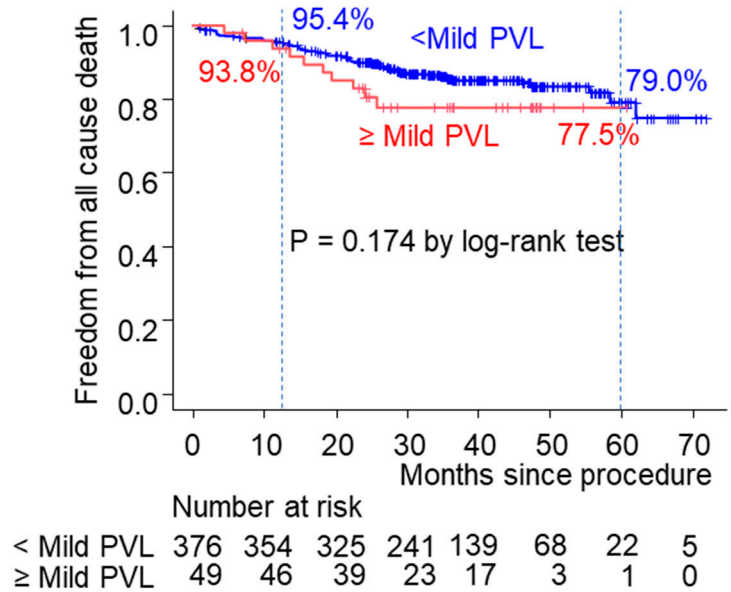

|                 | Number at risk |     |     |     |     |    |    |   |
|-----------------|----------------|-----|-----|-----|-----|----|----|---|
| < Mild PVL      | 376            | 354 | 325 | 241 | 139 | 68 | 22 | 5 |
| $\geq$ Mild PVL | 49             | 46  | 39  | 23  | 17  | 3  | 1  | 0 |

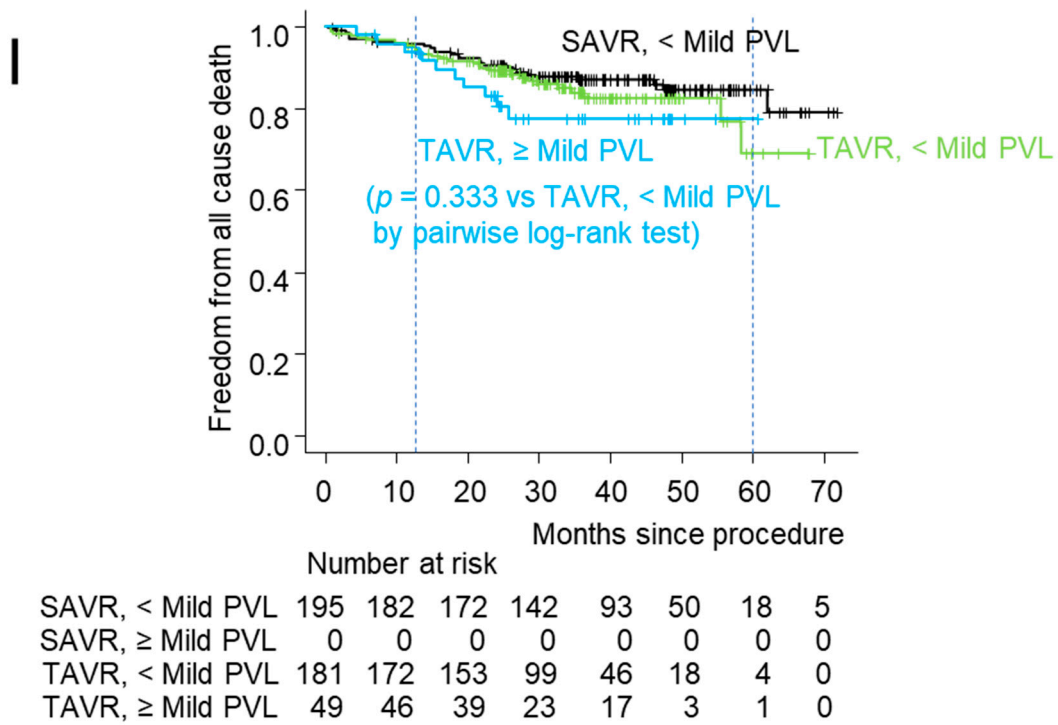

Figure S1. patient survival.

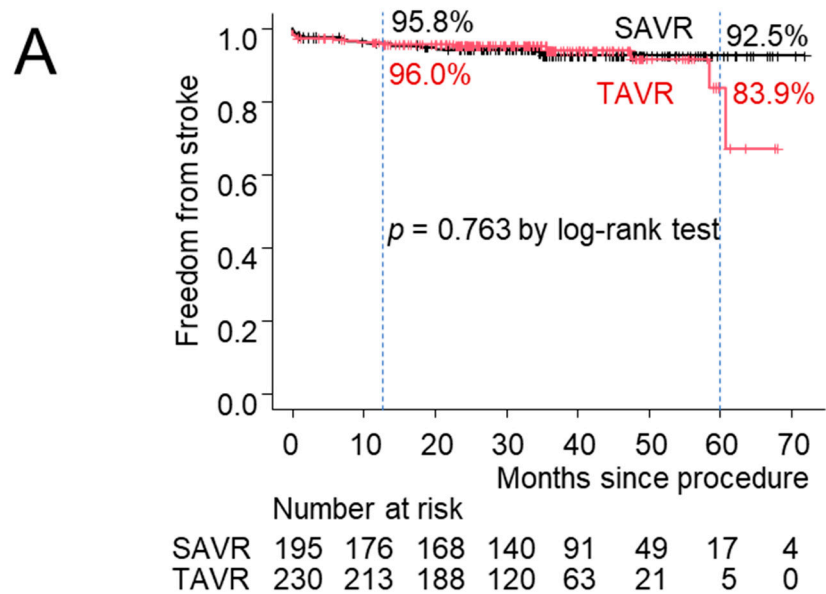

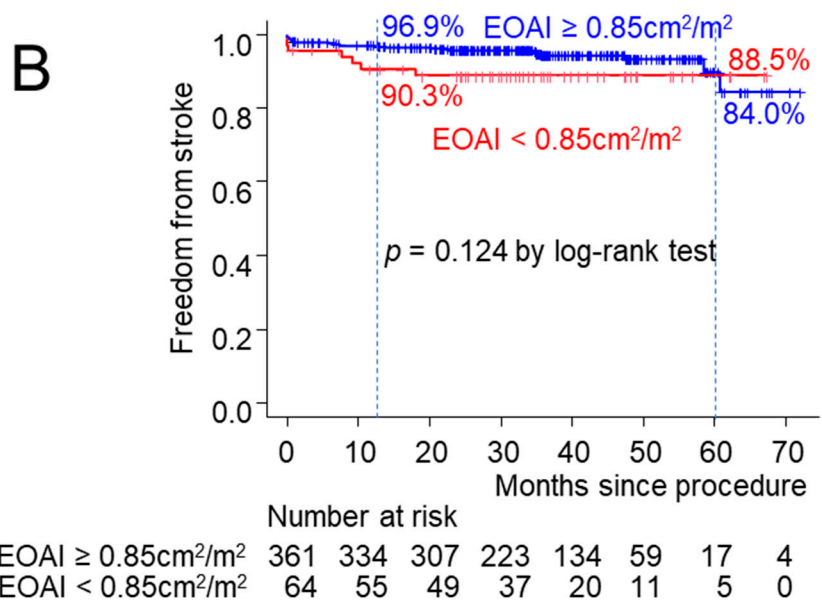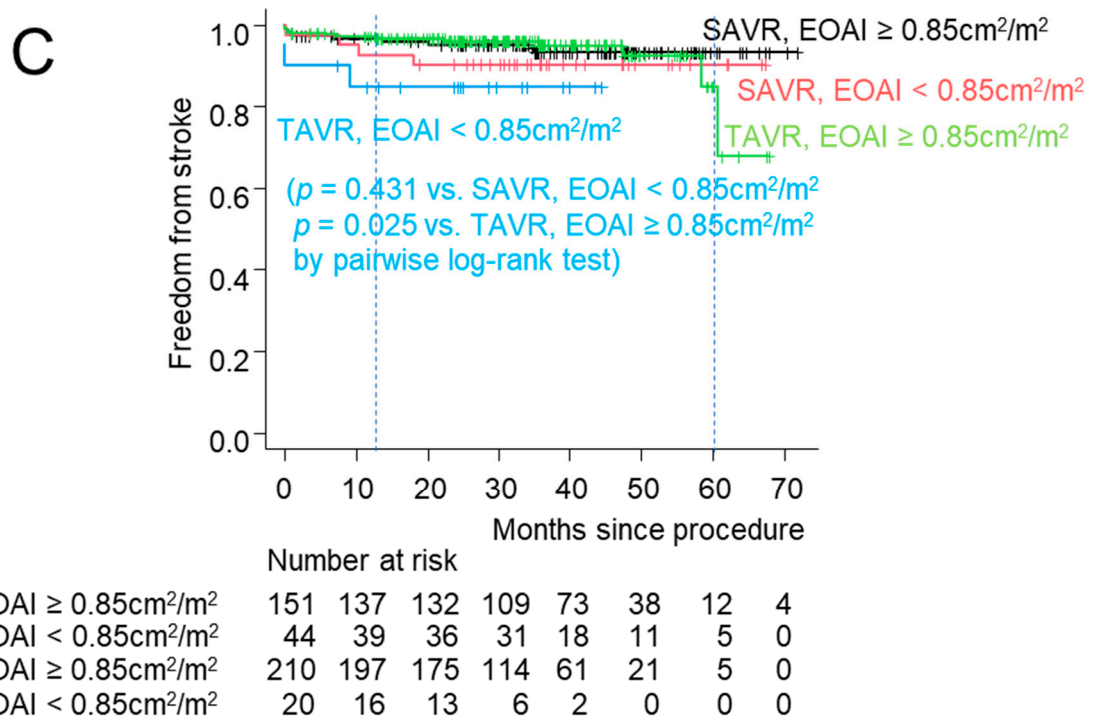

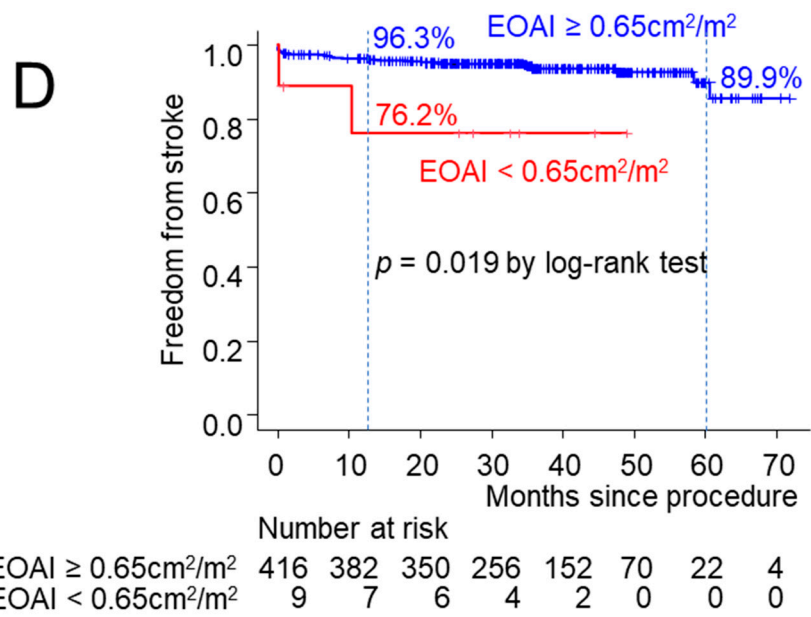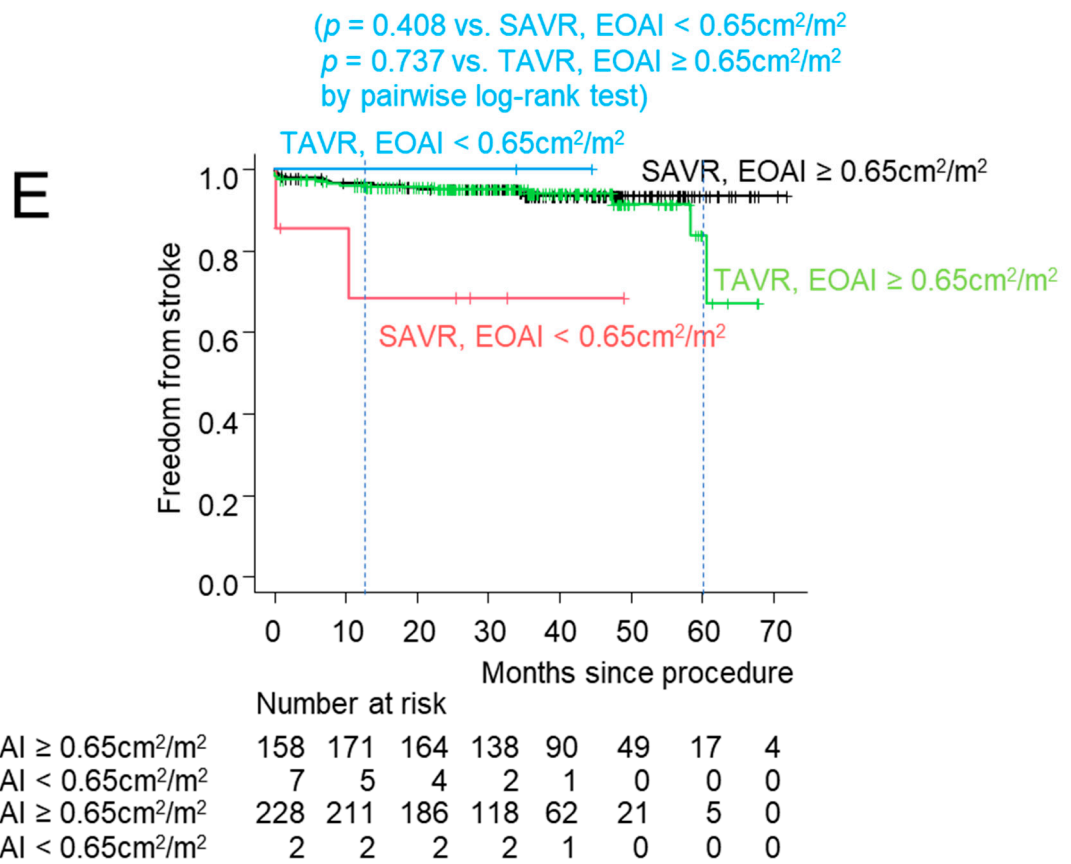



F

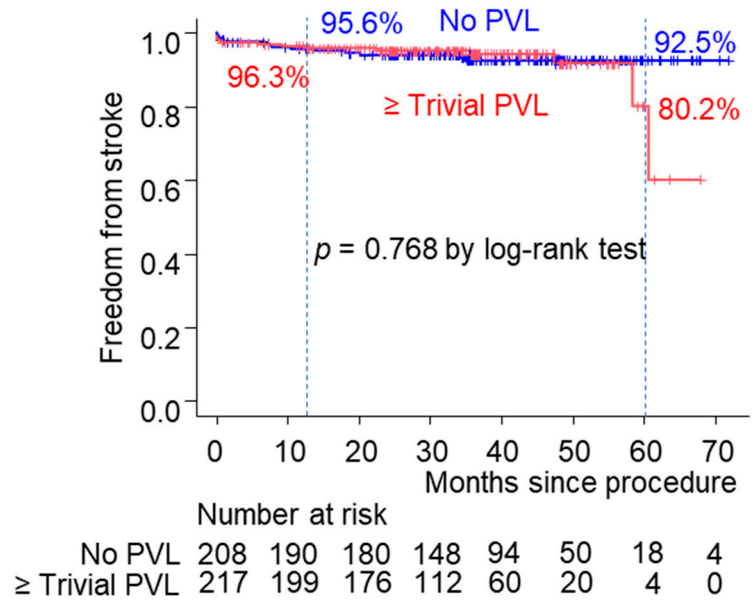

G

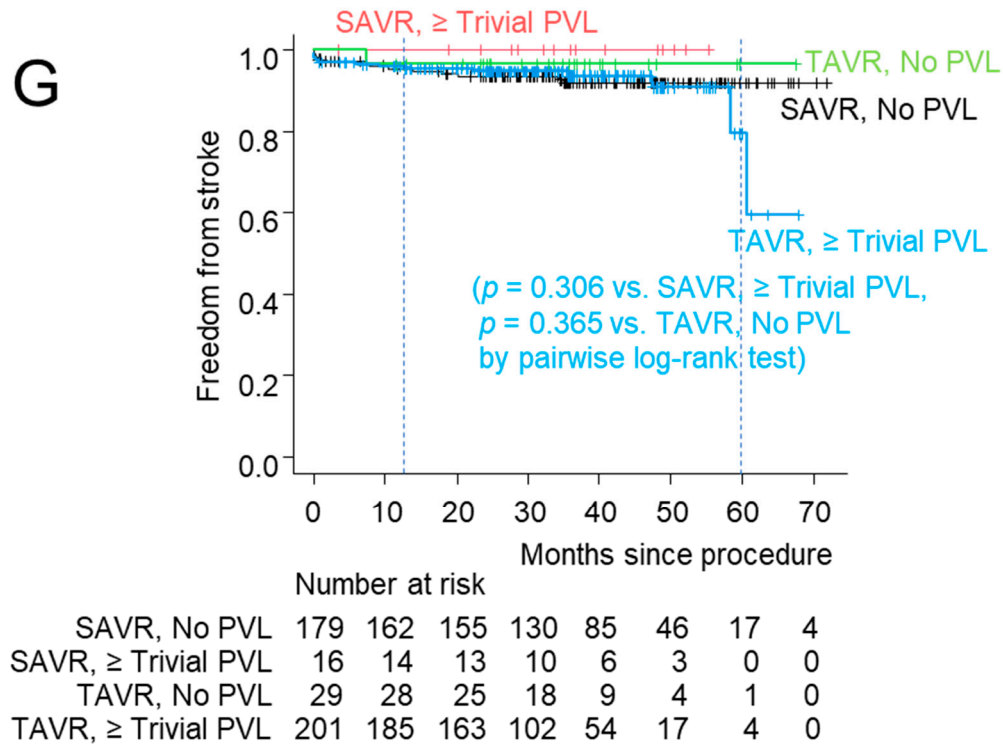



H

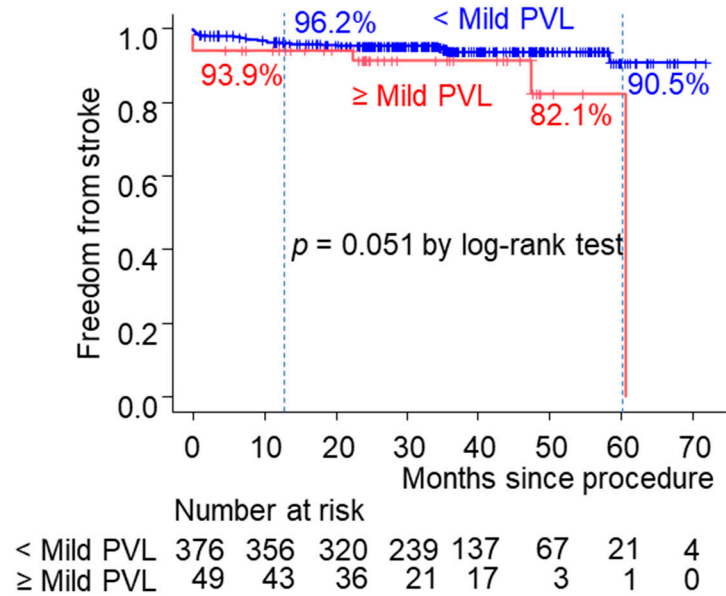

I

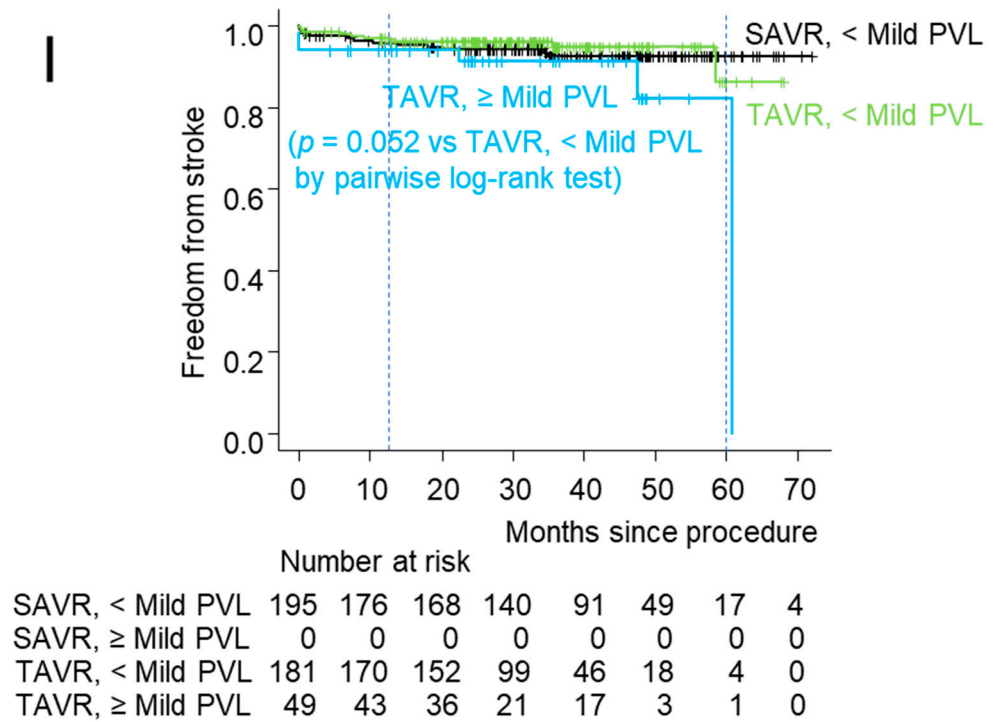

Figure S2. freedom from stroke.

A

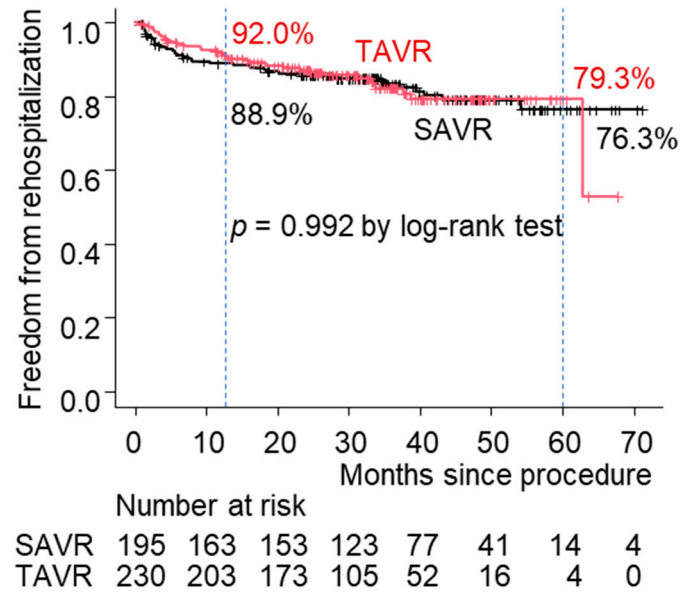

B

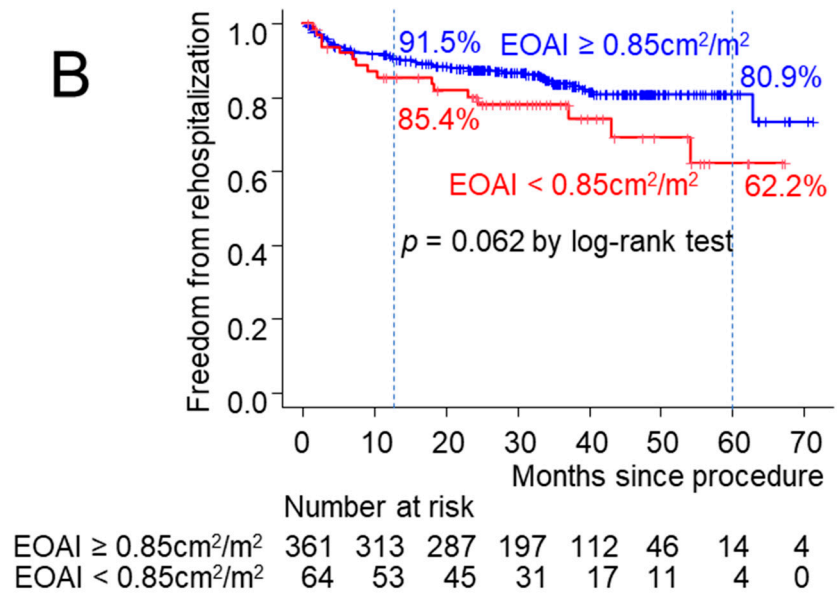

C

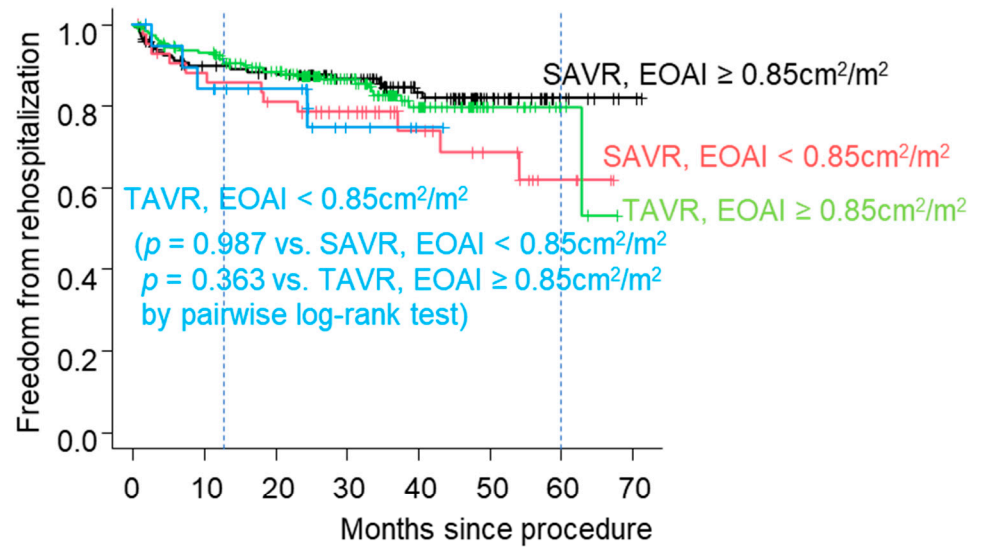

|                                             |                |     |     |     |    |    |    |   |
|---------------------------------------------|----------------|-----|-----|-----|----|----|----|---|
|                                             | Number at risk |     |     |     |    |    |    |   |
| SAVR, EOA $\geq 0.85\text{cm}^2/\text{m}^2$ | 151            | 126 | 120 | 96  | 61 | 30 | 10 | 4 |
| SAVR, EOA $< 0.85\text{cm}^2/\text{m}^2$    | 44             | 37  | 33  | 27  | 16 | 11 | 4  | 0 |
| TAVR, EOA $\geq 0.85\text{cm}^2/\text{m}^2$ | 210            | 187 | 161 | 101 | 51 | 16 | 4  | 0 |
| TAVR, EOA $< 0.85\text{cm}^2/\text{m}^2$    | 20             | 16  | 12  | 4   | 1  | 0  | 0  | 0 |

D

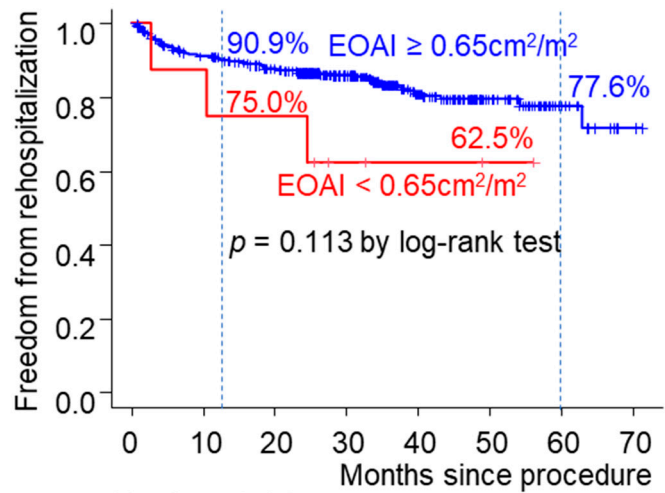

|                                       |                |     |     |     |     |    |    |   |
|---------------------------------------|----------------|-----|-----|-----|-----|----|----|---|
|                                       | Number at risk |     |     |     |     |    |    |   |
| EOA $\geq 0.65\text{cm}^2/\text{m}^2$ | 416            | 359 | 320 | 225 | 127 | 56 | 18 | 4 |
| EOA $< 0.65\text{cm}^2/\text{m}^2$    | 9              | 7   | 6   | 3   | 2   | 1  | 0  | 0 |

E

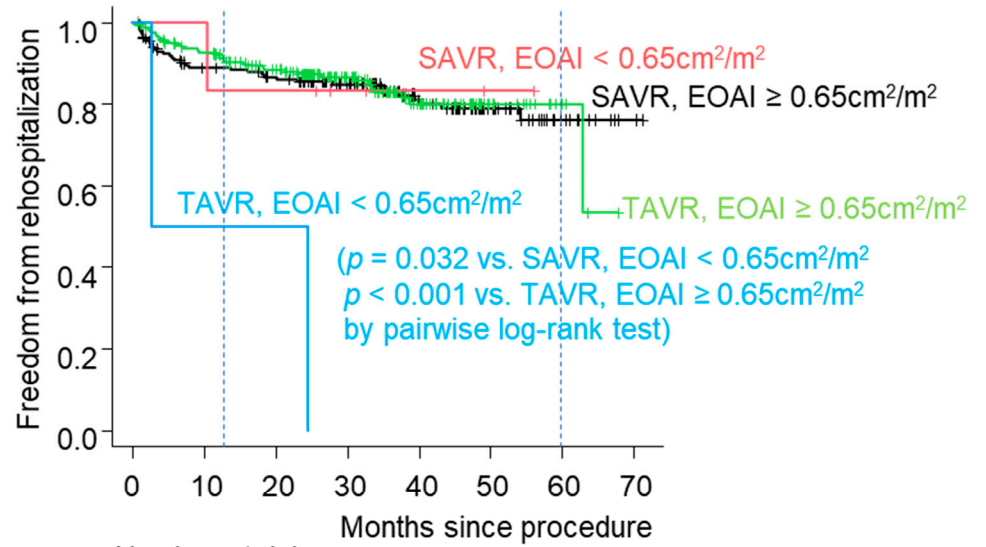

|                                                 | Number at risk |     |     |     |    |    |    |   |
|-------------------------------------------------|----------------|-----|-----|-----|----|----|----|---|
| SAVR, EOI ≥ 0.65cm <sup>2</sup> /m <sup>2</sup> | 188            | 157 | 148 | 120 | 75 | 40 | 14 | 4 |
| SAVR, EOI < 0.65cm <sup>2</sup> /m <sup>2</sup> | 7              | 6   | 5   | 3   | 2  | 1  | 0  | 0 |
| TAVR, EOI ≥ 0.65cm <sup>2</sup> /m <sup>2</sup> | 228            | 202 | 172 | 105 | 52 | 16 | 4  | 0 |
| TAVR, EOI < 0.65cm <sup>2</sup> /m <sup>2</sup> | 2              | 1   | 1   | 0   | 0  | 0  | 0  | 0 |

F

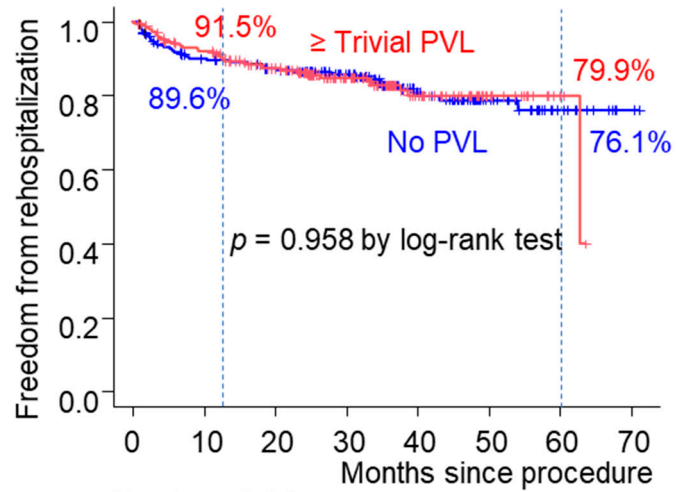

|               | Number at risk |     |     |     |    |    |    |   |
|---------------|----------------|-----|-----|-----|----|----|----|---|
| No PVL        | 208            | 176 | 164 | 131 | 79 | 40 | 15 | 4 |
| ≥ Trivial PVL | 217            | 190 | 162 | 97  | 50 | 17 | 3  | 0 |

G

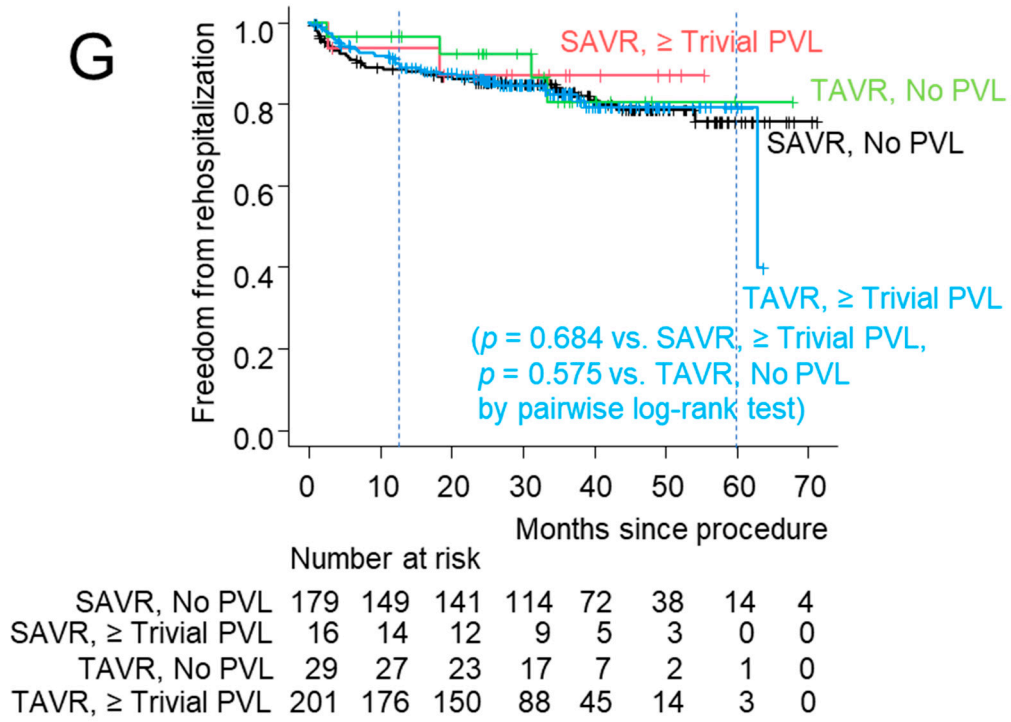

H

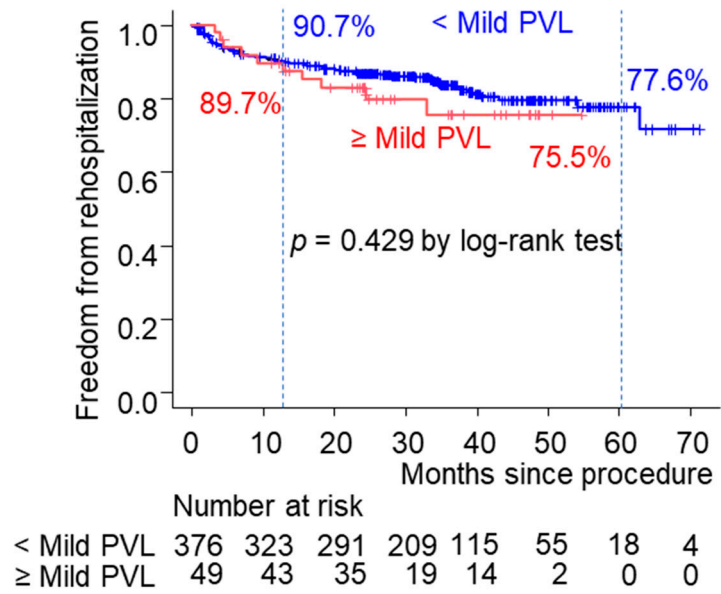

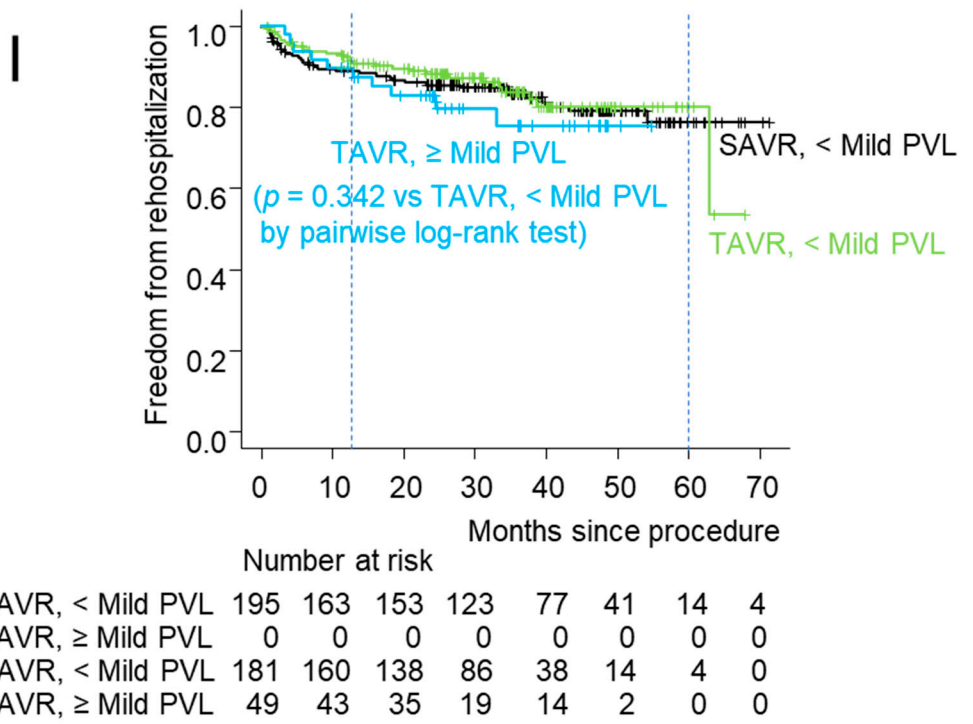

**Figure S3.** freedom from rehospitalization.
